# Supplementary material for: Bio-inspired liquid transport via elastocapillary interaction of a thin membrane with a liquid meniscus
Source: Royal Society of Chemistry journal article supplement (doi:10.1039/c7sm00940b), 2017-01-01
Supplement: c7sm00940b1.pdf [file c7sm00940b1.pdf]

## Electronic Supporting Information

### Bio-inspired liquid transport via elastocapillary interaction of a thin membrane with liquid meniscus

R. A. Samy<sup>1</sup>, D. George<sup>2</sup>, A. K. Sen<sup>1</sup>

<sup>1</sup>Department of Mechanical Engineering, Indian Institute of Technology Madras, Chennai, India

<sup>2</sup>Department of Mechanical and Aerospace Engineering, University of California, Irvine, USA

#### Supplementary Movies:

Movie S1: Shows that the membrane deformation is more pronounced when the membrane thickness decreases for the soft wedge case.

Movie S2: Shows that the meniscus velocity decreases with increase in the waiting time due to higher contact angle at longer waiting time for the soft wedge case.

Movie S3: Shows the motion of the advancing liquid meniscus on a flat membrane at different time instants.

Movie S4: Shows that meniscus motion follows Washburn regime for an initial length and for the remaining length, slow wicking was observed

Movie S5: Elastocapillary flow on a flat membrane with liquid feeding at a constant flow rate exceeding the elastocapillary flow rate.

#### Supplementary Figures:

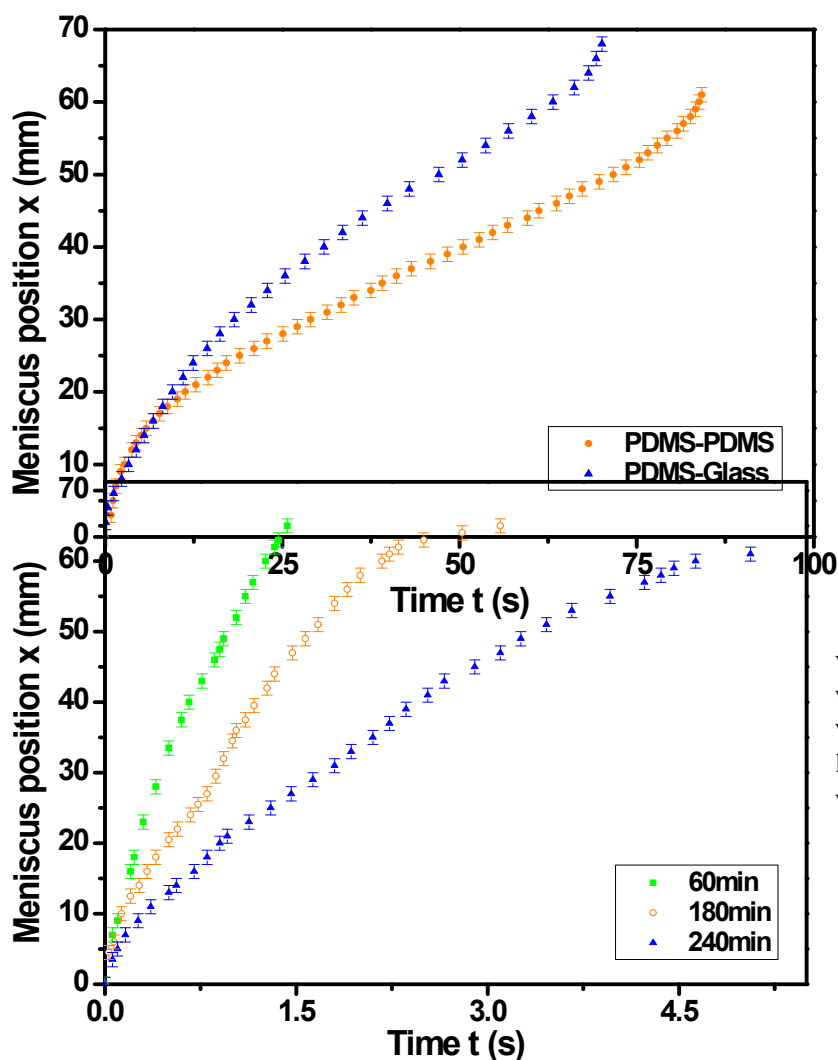

Fig. S1 The position  $x$  membrane of  $\mu\text{m}$  and olive oil substrates.

variation of the meniscus with time  $t$  for PDMS width 3 mm, thickness 80 length -60 mm using with PDMS and glass

**Fig. S2** The variation of the meniscus position  $x$  with time  $t$  for PDMS membrane of width 3 mm, thickness 67  $\mu\text{m}$  and length -60 mm using DI water with glass substrate after different waiting times of air plasma exposure.

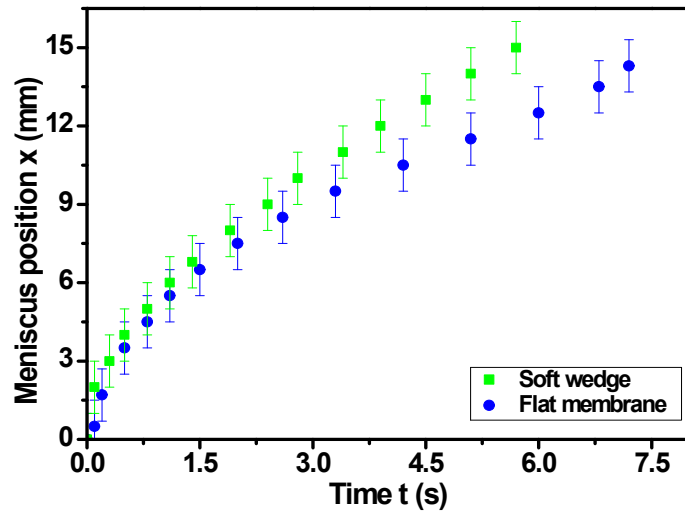

**Fig. S3** The variation of the meniscus position  $x$  with time  $t$  for PDMS membrane of width 4 mm, thickness 5  $\mu\text{m}$  and length 20 mm using olive oil in soft wedge and flat membrane.

**Table. SI.1:** Properties of the membrane used for comparison of modified Washburn constant from elastocapillary experiments and theoretical model prediction

| $\beta$ | Thickness (m) | Width (m) | Experiment $W_m$<br>(mm/s <sup>1/2</sup> ) | Theory $W_m$<br>(mm/s <sup>1/2</sup> ) | Error (%) |
|---------|---------------|-----------|--------------------------------------------|----------------------------------------|-----------|
| 3.15    | 0.00008       | 0.00195   | 0.48                                       | 0.61                                   | 26.8      |
| 9.6     | 0.00008       | 0.00315   | 0.56                                       | 0.61                                   | 9.7       |
| 11.5    | 0.000069      | 0.002     | 0.55                                       | 0.54                                   | 1.4       |
| 11.75   | 0.0001        | 0.0041    | 0.53                                       | 0.65                                   | 22.7      |
| 16      | 0.00009       | 0.004     | 0.59                                       | 0.47                                   | 19.7      |
